# Supplementary material for: Dynamic phase diagram of soft nanocolloids
Source: Royal Society of Chemistry journal article supplement (doi:10.1039/c5nr03702f), 2015-01-01
Supplement: c5nr03702f1.pdf [file c5nr03702f1.pdf]

Cite this: DOI: 10.1039/xxxxxxxxxx

## Dynamic Phase Diagram of Soft Nanocolloids Supplemental Material

Sudipta Gupta,<sup>\*a,b</sup> Manuel Camargo,<sup>c</sup> Jörg Stellbrink,<sup>a</sup> Jürgen Allgaier,<sup>a</sup>  
Aurel Radulescu,<sup>d</sup> Peter Lindner,<sup>e</sup> Emanuela Zaccarelli,<sup>f</sup> Christos N. Likos,<sup>g</sup>  
and Dieter Richter<sup>a</sup>

Received Date

Accepted Date

DOI: 10.1039/xxxxxxxxxx

www.rsc.org/journalname

### SANS modeling

The small angle neutron scattering (SANS) scattering cross section  $\frac{d\Sigma}{d\Omega}(Q)$  in absolute units [ $\text{cm}^{-1}$ ] following core-shell model<sup>1-3</sup> in dilute solution is given by (cf. Eq. (3) of the main paper)

$$\begin{aligned} \left(\frac{d\Sigma}{d\Omega}\right)(Q) &= N_z I_{cs}(Q) \\ &= N_z \left[ I_{\text{core}}(Q) + I_{\text{corona}}^b(Q) + I_{\text{inter}}(Q) + I_{\text{blob}}(Q) \right] \\ &= \frac{\phi}{V_m} \left[ V_{\text{core}}^2 N_{\text{agg}}^2 \Delta \rho_{\text{core}}^2 A_{\text{core}}^2 \right. \\ &\quad + V_{\text{corona}}^2 N_{\text{agg}} \left( N_{\text{agg}} - \frac{1}{1 + \hat{v}} \right) \Delta \rho_{\text{corona}}^2 A_{\text{corona}}^2 \\ &\quad + 2 V_{\text{core}} V_{\text{corona}} N_{\text{agg}}^2 \Delta \rho_{\text{core}} \Delta \rho_{\text{corona}} A_{\text{core}} A_{\text{corona}} \\ &\quad \left. + V_{\text{corona}}^2 N_{\text{agg}} \Delta \rho_{\text{corona}}^2 \left( \frac{P_p(Q)}{1 + \hat{v} P_p(Q)} \right) \right] \quad (1) \end{aligned}$$

where  $\Delta \rho_{\text{core}} = \rho_{\text{core}} - \rho_{\text{solvent}}$  and  $\Delta \rho_{\text{corona}} = \rho_{\text{corona}} - \rho_{\text{solvent}}$  are the contrast difference of the core and corona of the micelles with respect to the solvent and  $\rho_i$  the corresponding scattering length densities.  $V_{\text{core}}$  and  $V_{\text{corona}}$  are the volume per molecule

of the insoluble core and soluble corona blocks, respectively defined as  $V_i = M_i / (d_i N_A)$ , with  $N_A$  the Avogadro's number,  $d_i$  the bulk density and  $M_i$  the molecular weight in  $g/mol$  of the core or corona blocks.  $V_m = N_{\text{agg}} (V_{\text{core}} + V_{\text{corona}})$  as the micellar volume.  $\hat{v}$  is an effective virial type excluded volume parameter that scales with the effective concentration of the corona chains. Following Svaneborg and Pedersen,<sup>2,4</sup> the blob scattering from swollen corona chains was modeled as  $I_{\text{blob}}(Q)$ . In this model<sup>2</sup> the chains are considered to be self-avoiding and interact mutually by blobs and also with the homogeneous core following a hard sphere potential. The scattering amplitude from the core is given by

$$\begin{aligned} A_{\text{core}}(Q) &= \frac{\int_0^{R_c} dr 4\pi r^2 \frac{\sin(Qr)}{Qr} \phi_{\text{core}}(r)}{\int_0^{R_c} dr 4\pi r^2 \phi_{\text{core}}(r)} \exp\left(-\frac{c_s^2 Q^2}{2}\right) \\ &= 3 \frac{\sin(QR_c) - (QR_c) \cos(QR_c)}{(QR_c)^3} \exp\left(-\frac{c_s^2 Q^2}{2}\right) \quad (2) \end{aligned}$$

for a core density profile  $\phi_{\text{core}}=1$  (compact core). For strong segregation the core smearing parameter is generally kept  $c_s=0$ , causing no effective change in the scattering pattern.

The scattering amplitude from the corona or shell is given by

$$A_{\text{corona}}(Q) = \frac{\int_{R_c}^{R_m} dr 4\pi r^2 \frac{\sin(Qr)}{Qr} \phi_{\text{star}}(r)}{\int_{R_c}^{R_m} dr 4\pi r^2 \phi_{\text{star}}(r)} \exp\left(-\frac{s_s^2 Q^2}{2}\right) \quad (3)$$

Where  $\phi_{\text{star}}(r)$  the star-like density profile. For a finite size of the corona, the limit is chosen to be the micellar radius  $R_m$ , instead of  $\infty$ , with  $s_s$  the smearing parameter for the corona. For the linear chain form factor one can use the Beaucage form factor<sup>5,6</sup> given

<sup>a</sup> JCNS-1 and ICS-1, Forschungszentrum Jülich, Leo-Brandt-Straße, 52425 Jülich, Germany. E-mail: s.gupta@fz-juelich.de, j.stellbrink@fz-juelich.de

<sup>b</sup> JCNS-SNS, Oak Ridge National Laboratory (ORNL), Bethel Valley Road, TN-37831 Oak Ridge, USA.

<sup>c</sup> Centro de Investigaciones en Ciencias Básicas y Aplicadas, Universidad Antonio Nariño, Km 18 via Cali-Jamundí, 760030 Santiago de Cali, Colombia.

<sup>d</sup> JCNS-FRM II, Forschungszentrum Garching, Lichtenbergstraße 1, 85747 Garching, Germany.

<sup>e</sup> Institute Laue-Langevin, 6, rue Jules Horowitz, 38042 Grenoble CEDEX 9, France.

<sup>f</sup> CNR-ISC and Dipartimento di Fisica, Università di Roma La Sapienza Piazzale A. Moro 2, I-00185, Roma, Italy.

<sup>g</sup> Faculty of Physics, University of Vienna, Boltzmanngasse 5, A-1090 Vienna, Austria.

by:

$$P_p(Q) = \exp\left(-\frac{Q^2 R_g^2}{3}\right) + \frac{d_f}{R_g^{d_f}} \Gamma\left(\frac{d_f}{2}\right) \left[\frac{\text{erf}\left(R_g Q k \sqrt{6}\right)^3}{Q}\right]^{d_f} \quad (4)$$

Where,  $k = 1.06$ ,  $\Gamma$  is the Gamma function and  $d_f$  is the fractal dimension of the scattering particle,  $1 \leq d_f \leq 3$ . In this approach a polymer chain is considered as a mass fractal characterized by a single spatial length scale, the radius of gyration  $R_g$  of the linear chain, and a fractal dimension for polymers in good solvent is typically  $d_f = 1.7$ . The first term in Eq.(4) is from the Guinier expression<sup>7</sup>.

## DLS and rheology modeling

For dynamic light scattering (DLS) our data analysis of the experimental intensity auto correlation function (IACF)  $g_e^{(2)}(Q, t)$  was based on the inverse-Laplace transformation by CONTIN algorithm developed by Provencher<sup>8,9</sup> i.e.

$$g_e^{(1)}(Q, t) = \frac{1}{2\pi} \int_0^\infty d\Gamma G(\Gamma) \exp(-\Gamma t) \quad (5)$$

where  $\Gamma = DQ^2$ , with  $D$  the diffusion coefficient of the scattering particles. We use the CONTIN algorithm as provided by the ALV-software.

To yield the zero-shear viscosity  $\eta_0$  and to investigate the shear rate dependent viscosity (*shear thinning*) the Carreau equation<sup>10</sup> is used, which is given by:

$$\frac{\eta(\dot{\gamma}) - \eta_\infty}{\eta_0 - \eta_\infty} = \frac{1}{[1 + (\dot{\gamma}/\dot{\gamma}_c)^a]^{\frac{1-b}{a}}} \quad (6)$$

Where  $\eta_\infty$  denotes high shear rate Newtonian limit of viscosity. Frequently the high shear rate region is not observed, and  $\eta_\infty$  is set to zero in Eq.(6).  $\dot{\gamma}_c$  indicates the onset of the shear thinning and has the dimensions of  $s^{-1}$ ; the power law exponent,  $(1-b)$ , describes the dependence of the viscosity on shear rate in the shear thinning region. For our samples the value of  $(1-b)$  lies between 0.2 to 0.76 at intermediate concentration for  $\phi < \phi_m^*$ . It is to be noted that, for dilute concentration  $(1-b) = 0$ , gives the Newtonian plateau with zero-shear viscosity  $\eta_0$ . The additional dimensionless parameter 'a' represents the width of the transition region between the constant Newtonian plateau observed at low shear rates and the asymptotic power law decrease of the viscosity found at high shear rates. Value of  $a = 2$  is kept constant.

The Krieger-Dougherty (KD) model for solutions of spherical suspensions, it is given by :

$$\frac{\eta_0(\phi)}{\eta_{solv}} = \left(1 - \frac{\phi_{eff}}{\phi_{lim}}\right)^{-\varepsilon} \quad (KD) \quad (7)$$

Here  $\phi_{eff} = \phi$ , the effective volume fraction and  $\varepsilon = [\eta] \times \phi_{lim}$ , and Martin relations for solutions of spherical suspensions

$$\frac{\eta_0(\phi)}{\eta_{solv}} = 1 + [\eta] \phi e^{[K\phi]} \quad (Martin relation) \quad (8)$$

for  $\phi > \phi^*$ . Here, K is a constant and  $[\eta] = (\eta_0 - \eta_{solv}) / (\eta_{solv} \phi)$  is

the intrinsic viscosity in the limit  $\phi \rightarrow 0$ , of the system<sup>11</sup>.

## References

- 1 S. Gupta, *PhD Thesis*, University of Münster, 2012.
- 2 J. S. Pedersen, C. Svaneborg, K. Almdal, I. W. Hamley and R. N. Young, *Macromolecules*, 2003, **36**, 416–433.
- 3 R. Lund, V. Pipich, L. Willner, A. Radulescu, J. Colmenero and D. Richter, *Soft Matter*, 2011, **7**, 1491–1500.
- 4 C. Svaneborg and J. S. Pedersen, *Phys. Rev. E*, 2001, **64**, 010802.
- 5 G. Beaucage, *J. Appl. Cryst.*, 1995, **28**, 717.
- 6 G. Beaucage, *J. Appl. Cryst.*, 1996, **29**, 134.
- 7 P. Linder, *Neutrons, X-rays, and Light: Scattering methods applied to soft condensed matter*, Elsevier, North-Holland Delta Series, Amsterdam, 2002.
- 8 S. W. Provencher, *Computer Physics Communications*, 1982, **27**, 229–242.
- 9 S. W. Provencher, *Computer Physics Communications*, 1982, **27**, 213–227.
- 10 R. B. Bird, R. C. Armstrong and O. Hassager, *Dynamics of Polymeric Liquids*, John Wiley and Sons, New york, 1987, vol. 1.
- 11 W. M. Macosko, *Rheology Principles, Measurements and Applications*, Wiley-VCH, New York, 1994.
